# Supplementary material for: Investigating the Associations between Neurodevelopmental and Psychiatric Genetic Liability and Adverse Social and Functional Outcomes across Childhood, Adolescence and Young-Adulthood
Source: Research Square preprint supplement (doi:10.21203/rs.3.rs-7217396/v1), 2025-09-02
Supplement: Supplementary file 1 [file 0b5e78bc3c6e1883fe5fd5af.docx]

**Supplementary Materials**

***ALSPAC genetic data***

Quality control of genetic data was conducted as follows: INFO score <0.8, Hardy-Weinberg equilibrium p-value <1 x 10-4, genotyping rate <0.95 and minor allele frequency <0.01. Samples were filtered based on the exclusion of samples with a call rate <98%, duplicate samples and samples with sex discrepancies or identity-by-descent mismatch. Ancestry was determined using the GenoPred pipeline (37), individuals of European ancestry were retained for further analysis due to a limited sample size of other ancestry groups.

***Parent reported peer problems***

Rates of parent-reported peer problems in early adulthood were 27.44% (N=1 207), greater than that of self-reported rates (17.06%, N= 734).

***Lifetime suicidality in adolescence and early adulthood***

Whilst there was little difference between rates of current suicidality in adolescence (24.78%, N=1 234) and lifetime suicidality in adolescence (24.84%, N=1 237), rate of lifetime suicidality in early adulthood (29.40%, N=1 150) was over double that of current suicidality (14.63%, N=571).

***Supplementary Tables***

**Table S1**. Multivariable associations between each neuropsychiatric PGS and peer problems across development

| PGS | OR | SE | Lower 95% CI | Upper 95% CI | p-value | q-value |
| --- | --- | --- | --- | --- | --- | --- |
| *Childhood* |  |  |  |  |  |  |
| ADHD | 1.128 | 0.058 | 1.019 | 1.248 | 0.020 | 0.030 |
| ASD | 1.122 | 0.054 | 1.021 | 1.232 | 0.017 | 0.038 |
| SZ | 1.033 | 0.052 | 0.936 | 1.140 | 0.521 | 0.670 |
| BD | 1.002 | 0.049 | 0.910 | 1.102 | 0.972 | 0.972 |
| DEP | 1.176 | 0.064 | 1.057 | 1.309 | 0.003 | 0.007 |
| ANX | 1.031 | 0.050 | 0.937 | 1.135 | 0.527 | 0.791 |
| *Adolescence* | |  |  |  |  |  |
| ADHD | 1.210 | 0.061 | 1.095 | 1.336 | <0.0001 | <0.0005 |
| ASD | 1.041 | 0.050 | 0.948 | 1.143 | 0.400 | 0.514 |
| SZ | 0.962 | 0.048 | 0.872 | 1.060 | 0.431 | 0.647 |
| BD | 1.105 | 0.053 | 1.006 | 1.213 | 0.038 | 0.342 |
| DEP | 1.074 | 0.058 | 0.967 | 1.194 | 0.183 | 0.183 |
| ANX | 1.065 | 0.052 | 0.967 | 1.173 | 0.199 | 0.448 |
| *Early Adulthood* | |  |  |  |  |  |
| ADHD | 1.140 | 0.058 | 1.032 | 1.260 | 0.010 | 0.018 |
| ASD | 1.006 | 0.046 | 0.919 | 1.100 | 0.904 | 0.904 |
| SZ | 0.912 | 0.046 | 0.825 | 1.008 | 0.070 | 0.315 |
| BD | 0.949 | 0.049 | 0.856 | 1.051 | 0.315 | 0.567 |
| DEP | 1.213 | 0.065 | 1.092 | 1.347 | <0.0001 | <0.0005 |
| ANX | 1.029 | 0.050 | 0.935 | 1.133 | 0.559 | 0.719 |

Peer problems were parent reported in childhood and adolescence, and self-reported in early adulthood; Abbreviations: PGS, polygenic score; OR, odds ratio; SE, standard error; CI, confidence interval; q-value, FDR- corrected p<0.05; ASD, autism spectrum disorder; SZ, schizophrenia; BD, bipolar disorder; DEP, depression; ANX, anxiety.

**Table S2.** Multivariable associations between each neuropsychiatric PGS and educational Attainment/ unemployment across development

| PGS | OR | SE | Lower 95% CI | Upper 95% CI | p-value | q-value |
| --- | --- | --- | --- | --- | --- | --- |
| *Childhood* |  |  |  |  |  |  |
| ADHD | 1.398 | 0.060 | 1.286 | 1.521 | <0.0001 | <0.0005 |
| ASD | 0.884 | 0.038 | 0.812 | 0.961 | 0.004 | 0.018 |
| SZ | 1.001 | 0.042 | 0.922 | 1.086 | 0.985 | 0.985 |
| BD | 1.021 | 0.043 | 0.940 | 1.109 | 0.619 | 0.929 |
| DEP | 1.075 | 0.050 | 0.981 | 1.177 | 0.120 | 0.135 |
| ANX | 1.060 | 0.046 | 0.972 | 1.155 | 0.186 | 0.558 |
| *Adolescence* | |  |  |  |  |  |
| ADHD | 1.622 | 0.166 | 1.326 | 1.984 | <0.0001 | <0.0005 |
| ASD | 0.774 | 0.073 | 0.643 | 0.933 | 0.007 | 0.021 |
| SZ | 0.911 | 0.101 | 0.733 | 1.133 | 0.402 | 0.724 |
| BD | 0.854 | 0.079 | 0.711 | 1.025 | 0.090 | 0.405 |
| DEP | 1.386 | 0.156 | 1.111 | 1.729 | 0.004 | 0.007 |
| ANX | 0.993 | 0.098 | 0.817 | 1.207 | 0.946 | 1.064 |
| *Early Adulthood* | |  |  |  |  |  |
| ADHD | 1.288 | 0.115 | 1.081 | 1.536 | 0.005 | 0.011 |
| ASD | 0.959 | 0.075 | 0.822 | 1.119 | 0.594 | 0.668 |
| SZ | 0.912 | 0.080 | 0.768 | 1.083 | 0.292 | 0.657 |
| BD | 1.086 | 0.086 | 0.929 | 1.269 | 0.302 | 0.680 |
| DEP | 1.255 | 0.119 | 1.041 | 1.513 | 0.017 | 0.026 |
| ANX | 1.119 | 0.093 | 0.950 | 1.319 | 0.177 | 0.797 |

Abbreviations: PGS, polygenic score; OR, odds ratio; SE, standard error; CI, confidence interval; q-value, FDR- corrected p<0.05; ASD, autism spectrum disorder; SZ, schizophrenia; BD, bipolar disorder; DEP, depression; ANX, anxiety.

**Table S3**. Associations between each neuropsychiatric PGS and suicidality across development

| PGS | OR | SE | Lower 95% CI | Upper 95% CI | p-value | q-value |
| --- | --- | --- | --- | --- | --- | --- |
| *Childhood* |  |  |  |  |  |  |
| ADHD | 1.130 | 0.064 | 1.012 | 1.262 | 0.030 | 0.039 |
| ASD | 1.235 | 0.064 | 1.115 | 1.368 | <0.0001 | <0.0009 |
| SZ | 0.934 | 0.052 | 0.837 | 1.043 | 0.227 | 0.681 |
| BD | 0.993 | 0.053 | 0.893 | 1.103 | 0.894 | 1.149 |
| DEP | 1.103 | 0.069 | 0.976 | 1.248 | 0.117 | 0.150 |
| ANX | 1.120 | 0.064 | 1.001 | 1.253 | 0.047 | 0.423 |
| *Adolescence* | |  |  |  |  |  |
| ADHD | 1.067 | 0.042 | 0.989 | 1.152 | 0.095 | 0.107 |
| ASD | 1.072 | 0.040 | 0.996 | 1.153 | 0.063 | 0.113 |
| SZ | 0.997 | 0.040 | 0.922 | 1.078 | 0.941 | 1.059 |
| BD | 1.005 | 0.040 | 0.928 | 1.087 | 0.911 | 1.025 |
| DEP | 1.278 | 0.055 | 1.175 | 1.390 | <0.0001 | <0.0005 |
| ANX | 0.998 | 0.040 | 0.922 | 1.080 | 0.951 | 0.951 |
| *Early Adulthood* | |  |  |  |  |  |
| ADHD | 0.996 | 0.060 | 0.885 | 1.121 | 0.951 | 0.951 |
| ASD | 1.084 | 0.056 | 0.979 | 1.201 | 0.121 | 0.182 |
| SZ | 1.141 | 0.060 | 1.029 | 1.266 | 0.013 | 0.117 |
| BD | 0.914 | 0.051 | 0.820 | 1.019 | 0.107 | 0.321 |
| DEP | 1.415 | 0.081 | 1.264 | 1.583 | <0.0001 | <0.0005 |
| ANX | 1.040 | 0.059 | 0.931 | 1.163 | 0.484 | 0.871 |

Abbreviations: PGS, polygenic score; OR, odds ratio; SE, standard error; CI, confidence interval; q-value, FDR- corrected p<0.05; ASD, autism spectrum disorder; SZ, schizophrenia; BD, bipolar disorder; DEP, depression; ANX, anxiety.

**Table S4**. Multivariable associations between neuropsychiatric PGS and self-reported peer problems in early adulthood

| PGS | OR | SE | Lower 95% CI | Upper 95% CI | p-value |
| --- | --- | --- | --- | --- | --- |
| ADHD | 1.092 | 0.039 | 1.018 | 1.172 | 0.014 |
| ASD | 1.068 | 0.039 | 0.994 | 1.149 | 0.073 |
| SZ | 1.017 | 0.040 | 0.943 | 1.098 | 0.659 |
| BD | 1.036 | 0.040 | 0.960 | 1.119 | 0.363 |
| DEP | 1.148 | 0.050 | 1.054 | 1.250 | 0.002 |
| ANX | 0.983 | 0.040 | 0.907 | 1.065 | 0.676 |

*Abbreviations: PGS, polygenic score; OR, odds ratio; SE, standard error; CI, confidence interval; ASD, autism spectrum disorder; SZ, schizophrenia; BD, bipolar disorder; DEP, depression; ANX, anxiety.*

**Table S5**. Multivariable associations between neuropsychiatric PGS and lifetime suicidality in adolescence

| PGS | OR | SE | Lower 95% CI | Upper 95% CI | p-value |
| --- | --- | --- | --- | --- | --- |
| ADHD | 1.076 | 0.044 | 0.994 | 1.165 | 0.071 |
| ASD | 1.057 | 0.041 | 0.980 | 1.140 | 0.151 |
| SZ | 0.999 | 0.040 | 0.924 | 1.081 | 0.987 |
| BD | 0.994 | 0.039 | 0.920 | 1.074 | 0.882 |
| DEP | 1.275 | 0.055 | 1.172 | 1.387 | <0.00001 |
| ANX | 0.999 | 0.040 | 0.923 | 1.081 | 0.977 |

Abbreviations: PGS, polygenic score; OR, odds ratio; SE, standard error; CI, confidence interval; ASD, autism spectrum disorder; SZ, schizophrenia; BD, bipolar disorder; DEP, depression; ANX, anxiety.

**Table S6**. Multivariable associations between neuropsychiatric PGS and lifetime suicidality in early adulthood

| PGS | OR | SE | Lower 95% CI | Upper 95% CI | p-value |
| --- | --- | --- | --- | --- | --- |
| ADHD | 1.066 | 0.046 | 0.979 | 1.161 | 0.144 |
| ASD | 1.108 | 0.046 | 1.021 | 1.203 | 0.013 |
| SZ | 1.062 | 0.045 | 0.976 | 1.154 | 0.161 |
| BD | 0.965 | 0.041 | 0.888 | 1.049 | 0.405 |
| DEP | 1.357 | 0.064 | 1.237 | 1.489 | <0.00001 |
| ANX | 1.005 | 0.043 | 0.924 | 1.093 | 0.912 |

*Abbreviations: PGS, polygenic score; OR, odds ratio; SE, standard error; CI, confidence interval; ASD, autism spectrum disorder; SZ, schizophrenia; BD, bipolar disorder; DEP, depression; ANX, anxiety.*

**Table S7**. Associations between neuropsychiatric PGS and peer problems across development in unimputed data (listwise deletion)

| PGS | OR | SE | Lower 95% CI | Upper 95% CI | p-value |
| --- | --- | --- | --- | --- | --- |
| *Childhood (N=7 962)* | | | | | |
| ADHD | 1.112 | 0.057 | 1.005 | 1.230 | 0.039 |
| ASD | 1.134 | 0.056 | 1.031 | 1.249 | 0.010 |
| SZ | 1.036 | 0.052 | 0.939 | 1.143 | 0.486 |
| BD | 1.007 | 0.050 | 0.913 | 1.110 | 0.896 |
| DEP | 1.179 | 0.064 | 1.059 | 1.312 | 0.003 |
| ANX | 1.029 | 0.052 | 0.931 | 1.137 | 0.577 |
| *Adolescence (N=7 269)* | | | | | |
| ADHD | 1.196 | 0.063 | 1.079 | 1.325 | 0.0006 |
| ASD | 1.047 | 0.052 | 0.950 | 1.153 | 0.353 |
| SZ | 0.974 | 0.049 | 0.882 | 1.076 | 0.605 |
| BD | 1.099 | 0.056 | 0.995 | 1.213 | 0.061 |
| DEP | 1.059 | 0.058 | 0.951 | 1.180 | 0.297 |
| ANX | 1.081 | 0.056 | 0.977 | 1.196 | 0.132 |
| *Early Adulthood (N=4 302)* | | | | | |
| ADHD | 1.130 | 0.058 | 1.022 | 1.250 | 0.017 |
| ASD | 1.020 | 0.050 | 0.926 | 1.123 | 0.688 |
| SZ | 0.912 | 0.047 | 0.826 | 1.008 | 0.072 |
| BD | 0.945 | 0.048 | 0.857 | 1.043 | 0.263 |
| DEP | 1.200 | 0.067 | 1.075 | 1.339 | 0.001 |
| ANX | 1.045 | 0.053 | 0.946 | 1.154 | 0.384 |

Peer problems were parent-reported in childhood and adolescence, and self-reported in early adulthood. Abbreviations: PGS, polygenic score; OR, odds ratio; SE, standard error; CI, confidence interval; ASD, autism spectrum disorder; SZ, schizophrenia; BD, bipolar disorder; DEP, depression; ANX, anxiety.

**Table S8**. Associations between neuropsychiatric PGS and educational attainment/ employment across development in unimputed data (listwise deletion)

| PGS | OR | SE | Lower 95% CI | Upper 95% CI | p-value |
| --- | --- | --- | --- | --- | --- |
| *Childhood (N=5 669)* | | | | | |
| ADHD | 1.333 | 0.064 | 1.214 | 1.465 | <0.00001 |
| ASD | 0.909 | 0.041 | 0.831 | 0.994 | 0.036 |
| SZ | 1.030 | 0.048 | 0.940 | 1.128 | 0.531 |
| BD | 1.006 | 0.047 | 0.918 | 1.101 | 0.903 |
| DEP | 1.037 | 0.052 | 0.940 | 1.144 | 0.472 |
| ANX | 1.070 | 0.051 | 0.975 | 1.175 | 0.151 |
| *Adolescence (N=3 270)* | | | | | |
| ADHD | 1.539 | 0.180 | 1.225 | 1.935 | 0.0002 |
| ASD | 0.776 | 0.086 | 0.625 | 0.964 | 0.022 |
| SZ | 0.939 | 0.111 | 0.744 | 1.184 | 0.594 |
| BD | 0.807 | 0.092 | 0.647 | 1.008 | 0.059 |
| DEP | 1.427 | 0.176 | 1.120 | 1.817 | 0.004 |
| ANX | 0.963 | 0.112 | 0.766 | 1.211 | 0.747 |
| *Early Adulthood (N=4 019)* | | | | | |
| ADHD | 1.242 | 0.106 | 1.050 | 1.468 | 0.012 |
| ASD | 0.964 | 0.079 | 0.822 | 1.131 | 0.652 |
| SZ | 0.906 | 0.077 | 0.768 | 1.070 | 0.244 |
| BD | 1.085 | 0.090 | 0.921 | 1.277 | 0.329 |
| DEP | 1.251 | 0.116 | 1.043 | 1.500 | 0.016 |
| ANX | 1.117 | 0.094 | 0.947 | 1.316 | 0.188 |

Abbreviations: PGS, polygenic score; OR, odds ratio; SE, standard error; CI, confidence interval; ASD, autism spectrum disorder; SZ, schizophrenia; BD, bipolar disorder; DEP, depression; ANX, anxiety.

**Table S9**. Associations between neuropsychiatric PGS and suicidality across development in unimputed data (listwise deletion)

| PGS | OR | SE | Lower 95% CI | Upper 95% CI | p-value |
| --- | --- | --- | --- | --- | --- |
| *Childhood (N=6 255)* | | | | | |
| ADHD | 1.123 | 0.064 | 1.004 | 1.256 | 0.042 |
| ASD | 1.242 | 0.067 | 1.116 | 1.381 | 0.0001 |
| SZ | 0.941 | 0.052 | 0.844 | 1.050 | 0.279 |
| BD | 0.996 | 0.055 | 0.894 | 1.110 | 0.943 |
| DEP | 1.102 | 0.067 | 0.979 | 1.241 | 0.107 |
| ANX | 1.129 | 0.064 | 1.011 | 1.261 | 0.031 |
| *Adolescence (N=4 980)* | | | | | |
| ADHD | 1.079 | 0.044 | 0.996 | 1.168 | 0.063 |
| ASD | 1.057 | 0.041 | 0.980 | 1.140 | 0.154 |
| SZ | 1.002 | 0.040 | 0.926 | 1.083 | 0.967 |
| BD | 0.994 | 0.039 | 0.920 | 1.074 | 0.876 |
| DEP | 1.275 | 0.055 | 1.172 | 1.387 | <0.00001 |
| ANX | 0.998 | 0.040 | 0.922 | 1.079 | 0.952 |
| *Early Adulthood (N=3 904)* | | | | | |
| ADHD | 1.009 | 0.057 | 0.903 | 1.127 | 0.875 |
| ASD | 1.075 | 0.058 | 0.967 | 1.194 | 0.180 |
| SZ | 1.146 | 0.063 | 1.028 | 1.277 | 0.014 |
| BD | 0.911 | 0.050 | 0.819 | 1.015 | 0.090 |
| DEP | 1.401 | 0.085 | 1.244 | 1.578 | <0.00001 |
| ANX | 1.029 | 0.057 | 0.923 | 1.147 | 0.609 |

Abbreviations: PGS, polygenic score; OR, odds ratio; SE, standard error; CI, confidence interval; ASD, autism spectrum disorder; SZ, schizophrenia; BD, bipolar disorder; DEP, depression; ANX, anxiety.

**Table S10**. Univariate associations between neuropsychiatric PGS and peer problems across development

| PGS | OR | SE | Lower 95% CI | Upper 95% CI | p-value | q-value |
| --- | --- | --- | --- | --- | --- | --- |
| *Childhood* | |  |  |  |  |  |
| ADHD | 1.225 | 0.057 | 1.118 | 1.344 | <0.0001 | <0.0005 |
| ASD | 1.177 | 0.055 | 1.075 | 1.289 | <0.0001 | <0.0005 |
| SZ | 1.089 | 0.052 | 0.993 | 1.195 | 0.071 | 0.113 |
| BD | 1.051 | 0.049 | 0.959 | 1.153 | 0.286 | 0.351 |
| DEP | 1.260 | 0.060 | 1.148 | 1.383 | <0.0001 | <0.0005 |
| ANX | 1.131 | 0.051 | 1.035 | 1.235 | 0.006 | 0.0116 |
| *Adolescence* | |  |  |  |  |  |
| ADHD | 1.261 | 0.059 | 1.151 | 1.383 | <0.0001 | <0.0005 |
| ASD | 1.101 | 0.051 | 1.006 | 1.206 | 0.037 | 0.0605 |
| SZ | 1.029 | 0.049 | 0.938 | 1.129 | 0.547 | 0.615 |
| BD | 1.124 | 0.052 | 1.027 | 1.230 | 0.011 | 0.0195 |
| DEP | 1.183 | 0.056 | 1.077 | 1.299 | <0.0001 | <0.0005 |
| ANX | 1.137 | 0.052 | 1.039 | 1.245 | 0.005 | 0.0102 |
| *Early Adulthood* | |  |  |  |  |  |
| ADHD | 1.205 | 0.055 | 1.101 | 1.319 | <0.0001 | <0.0005 |
| ASD | 1.046 | 0.045 | 0.961 | 1.139 | 0.297 | 0.356 |
| SZ | 0.946 | 0.044 | 0.864 | 1.036 | 0.232 | 0.309 |
| BD | 0.962 | 0.045 | 0.877 | 1.055 | 0.410 | 0.471 |
| DEP | 1.249 | 0.059 | 1.138 | 1.369 | <0.0001 | <0.0005 |
| ANX | 1.112 | 0.051 | 1.016 | 1.217 | 0.022 | 0.0371 |

Peer problems were parent-reported in childhood and adolescence and self-reported in early adulthood. Abbreviations: PGS, polygenic score; OR, odds ratio; SE, standard error; CI, confidence interval; q-value, FDR- corrected p<0.05; ASD, autism spectrum disorder; SZ, schizophrenia; BD, bipolar disorder; DEP, depression; ANX, anxiety.

**Table S11***.* Univariate associations between neuropsychiatric PGS and educational attainment across development (univariate)

| PGS | OR | SE | Lower 95% CI | Upper 95% CI | p-value | q-value |
| --- | --- | --- | --- | --- | --- | --- |
| *Childhood* | |  |  |  |  |  |
| ADHD | 1.408 | 0.056 | 1.302 | 1.522 | <0.0001 | <0.0005 |
| ASD | 0.961 | 0.039 | 0.887 | 1.041 | 0.330 | 0.387 |
| SZ | 1.047 | 0.042 | 0.968 | 1.132 | 0.251 | 0.323 |
| BD | 1.044 | 0.042 | 0.965 | 1.130 | 0.285 | 0.358 |
| DEP | 1.206 | 0.050 | 1.112 | 1.308 | <0.0001 | <0.0005 |
| ANX | 1.135 | 0.046 | 1.049 | 1.229 | 0.002 | 0.0045 |
| *Adolescence* | |  |  |  |  |  |
| ADHD | 1.666 | 0.156 | 1.385 | 2.003 | <0.0001 | <0.0005 |
| ASD | 0.872 | 0.077 | 0.734 | 1.037 | 0.120 | 0.185 |
| SZ | 0.952 | 0.096 | 0.781 | 1.162 | 0.629 | 0.679 |
| BD | 0.880 | 0.076 | 0.743 | 1.044 | 0.141 | 0.200 |
| DEP | 1.494 | 0.144 | 1.236 | 1.806 | <0.0001 | <0.0005 |
| ANX | 1.146 | 0.103 | 0.961 | 1.367 | 0.129 | 0.194 |
| *Early Adulthood* | |  |  |  |  |  |
| ADHD | 1.389 | 0.114 | 1.182 | 1.632 | <0.0001 | <0.0005 |
| ASD | 1.045 | 0.080 | 0.899 | 1.214 | 0.566 | 0.624 |
| SZ | 1.003 | 0.081 | 0.855 | 1.177 | 0.970 | 0.970 |
| BD | 1.115 | 0.081 | 0.966 | 1.286 | 0.136 | 0.198 |
| DEP | 1.403 | 0.115 | 1.195 | 1.648 | <0.0001 | <0.0005 |
| ANX | 1.258 | 0.095 | 1.085 | 1.459 | 0.002 | 0.0045 |

Abbreviations: PGS, polygenic score; OR, odds ratio; SE, standard error; CI, confidence interval; q-value, FDR- corrected p<0.05; ASD, autism spectrum disorder; SZ, schizophrenia; BD, bipolar disorder; DEP, depression; ANX, anxiety.

**Table S12***.* Univariate associations between neuropsychiatric PGS and suicidality across development (univariate)

| PGS | OR | SE | Lower 95% CI | Upper 95% CI | p-value | q-value |
| --- | --- | --- | --- | --- | --- | --- |
| *Childhood* | |  |  |  |  |  |
| ADHD | 1.230 | 0.064 | 1.111 | 1.362 | <0.0001 | <0.0005 |
| ASD | 1.285 | 0.064 | 1.164 | 1.412 | <0.0001 | <0.0005 |
| SZ | 0.989 | 0.052 | 0.892 | 1.097 | 0.841 | 0.873 |
| BD | 1.022 | 0.052 | 0.925 | 1.128 | 0.669 | 0.708 |
| DEP | 1.211 | 0.065 | 1.090 | 1.345 | <0.0001 | <0.0005 |
| ANX | 1.196 | 0.063 | 1.079 | 1.326 | 0.001 | 0.0025 |
| *Adolescence* | |  |  |  |  |  |
| ADHD | 1.170 | 0.043 | 1.089 | 1.257 | <0.0001 | <0.0005 |
| ASD | 1.116 | 0.040 | 1.040 | 1.198 | 0.002 | 0.0045 |
| SZ | 1.054 | 0.040 | 0.979 | 1.135 | 0.159 | 0.220 |
| BD | 1.047 | 0.040 | 0.971 | 1.129 | 0.232 | 0.309 |
| DEP | 1.314 | 0.050 | 1.220 | 1.416 | <0.0001 | <0.0005 |
| ANX | 1.109 | 0.041 | 1.032 | 1.193 | 0.005 | 0.0102 |
| *Early Adulthood* | |  |  |  |  |  |
| ADHD | 1.149 | 0.061 | 1.035 | 1.275 | 0.009 | 0.0168 |
| ASD | 1.135 | 0.056 | 1.030 | 1.251 | 0.011 | 0.0195 |
| SZ | 1.193 | 0.060 | 1.081 | 1.316 | <0.0001 | <0.0005 |
| BD | 1.004 | 0.052 | 0.906 | 1.112 | 0.940 | 0.958 |
| DEP | 1.459 | 0.072 | 1.324 | 1.608 | <0.0001 | <0.0005 |
| ANX | 1.192 | 0.062 | 1.077 | 1.320 | 0.001 | 0.0025 |

Abbreviations: PGS, polygenic score; OR, odds ratio; SE, standard error; CI, confidence interval; q-value, FDR- corrected p<0.05; ASD, autism spectrum disorder; SZ, schizophrenia; BD, bipolar disorder; DEP, depression; ANX, anxiety.
